# Supplementary material for: Untreated Vestibular Schwannoma: Analysis of the Determinants of Growth
Source: MDPI journal article supplement (doi:10.3390/cancers16213718), 2024-11-04
Supplement: s1 [file cancers-3264963-supplementary.pdf › cancers-3264963-supplementary.pdf]

| Reference               | Selection                         |                             |                            |                                                      | comparability                                | Outcome            |                                  |                             | Score |
|-------------------------|-----------------------------------|-----------------------------|----------------------------|------------------------------------------------------|----------------------------------------------|--------------------|----------------------------------|-----------------------------|-------|
|                         | Representative<br>ness of the ex- | Selection of<br>the nonexp- | Ascertainm<br>en of inter- | Demonstration that outc-<br>ome of int-erest was not | .Comparability of<br>cohorts on the basis of | Assessme-<br>nt of | Was follow-up long<br>enough for | Adequacy of<br>follow up to |       |
| MarcDiensthuber 2005    | ★                                 | ★                           | ★                          | ☆                                                    | ★ ☆                                          | ★                  | ★                                | ☆                           | 6     |
| DAVID FLINT,2005        | ★                                 | ★                           | ★                          | ☆                                                    | ★★                                           | ★                  | ★                                | ☆                           | 7     |
| Amit Herwadker,2005     | ★                                 | ★                           | ★                          | ☆                                                    | ★ ☆                                          | ★                  | ★                                | ★                           | 7     |
| Sven-Eric S,2006        | ★                                 | ★                           | ★                          | ☆                                                    | ★★                                           | ★                  | ★                                | ★                           | 8     |
| C. Arturo Solares,2008  | ★                                 | ★                           | ★                          | ☆                                                    | ★★                                           | ★                  | ★                                | ☆                           | 7     |
| Wissame El B,2009       | ★                                 | ★                           | ★                          | ☆                                                    | ★★                                           | ★                  | ★                                | ☆                           | 7     |
| K. WHITEHOUSE,2010      | ★                                 | ★                           | ★                          | ☆                                                    | ★ ☆                                          | ★                  | ★                                | ★                           | 7     |
| RSURYANARAYANAN,2010    | ★                                 | ★                           | ★                          | ☆                                                    | ★★                                           | ★                  | ★                                | ★                           | 8     |
| Yuri Agrawal,2010       | ★                                 | ★                           | ★                          | ☆                                                    | ★★                                           | ★                  | ★                                | ☆                           | 7     |
| Ferdinand C. A. T,2011  | ★                                 | ★                           | ★                          | ☆                                                    | ★★                                           | ★                  | ☆                                | ☆                           | 6     |
| Mark Hughes,2011        | ★                                 | ★                           | ★                          | ☆                                                    | ★★                                           | ★                  | ★                                | ★                           | 8     |
| Cathrine N Breivik,2011 | ★                                 | ★                           | ★                          | ☆                                                    | ★ ☆                                          | ★                  | ★                                | ★                           | 7     |
| David A. Moffat,2012    | ★                                 | ★                           | ★                          | ☆                                                    | ★ ☆                                          | ★                  | ★                                | ☆                           | 6     |
| Jong Dae Lee,2014       | ☆                                 | ★                           | ★                          | ☆                                                    | ★ ☆                                          | ★                  | ★                                | ☆                           | 5     |
| Ricardo José G.,2014    | ★                                 | ★                           | ★                          | ☆                                                    | ★ ☆                                          | ★                  | ★                                | ☆                           | 6     |
| Daniel Jethanamest,2015 | ★                                 | ★                           | ★                          | ☆                                                    | ★★                                           | ★                  | ★                                | ☆                           | 7     |
| Yosuke Tomita,2015      | ★                                 | ★                           | ★                          | ☆                                                    | ★★                                           | ★                  | ★                                | ★                           | 8     |

|                         |   |   |   |   |    |   |   |   |   |
|-------------------------|---|---|---|---|----|---|---|---|---|
| Wolbers, J.G.,2016      | ★ | ★ | ★ | ☆ | ★★ | ★ | ★ | ★ | 8 |
| Charles R.J.,2016       | ★ | ★ | ★ | ☆ | ★☆ | ★ | ★ | ☆ | 6 |
| Prasad, S. C.,2017      | ★ | ★ | ★ | ☆ | ★☆ | ★ | ★ | ☆ | 6 |
| Jacob B. Hunter,2017    | ★ | ★ | ★ | ☆ | ★☆ | ★ | ★ | ☆ | 6 |
| Katherine A. Lees,2018  | ★ | ★ | ★ | ☆ | ★☆ | ★ | ★ | ☆ | 6 |
| Maarten Kleijwegt,2019  | ★ | ★ | ★ | ☆ | ★★ | ★ | ★ | ☆ | 7 |
| Siska D' Haese,2019     | ★ | ★ | ★ | ☆ | ★★ | ★ | ★ | ☆ | 7 |
| Daniele Borsetto,2019   | ★ | ★ | ★ | ☆ | ★★ | ★ | ★ | ☆ | 7 |
| Mantegh Sethi,2020      | ★ | ★ | ★ | ☆ | ★★ | ★ | ★ | ☆ | 7 |
| Zane Schnurman,2020     | ★ | ★ | ★ | ☆ | ★☆ | ★ | ★ | ☆ | 6 |
| Martin Reznitsky,2020   | ★ | ★ | ★ | ☆ | ★☆ | ★ | ★ | ★ | 7 |
| Kathrin Skorpa, 2020    | ★ | ★ | ★ | ☆ | ★☆ | ★ | ★ | ★ | 7 |
| Maxime Fieux,2020       | ★ | ★ | ★ | ☆ | ★★ | ★ | ★ | ★ | 8 |
| John P. Marinelli,2021  | ★ | ★ | ★ | ☆ | ★☆ | ★ | ★ | ★ | 7 |
| John P. Marinelli,2021  | ★ | ★ | ★ | ☆ | ★☆ | ★ | ★ | ☆ | 6 |
| Jong Sei Kim,2021       | ★ | ★ | ★ | ☆ | ★★ | ★ | ★ | ★ | 8 |
| Yoshinori Higuchi,2021  | ★ | ★ | ★ | ☆ | ★★ | ★ | ★ | ★ | 8 |
| Mavke A. Hentschel,2021 | ★ | ★ | ★ | ☆ | ★☆ | ★ | ★ | ★ | 7 |
| A Dardis,2021           | ★ | ★ | ★ | ☆ | ★☆ | ★ | ★ | ☆ | 6 |
| Hirovuki Yamada,2022    | ★ | ★ | ★ | ☆ | ★★ | ★ | ★ | ☆ | 7 |
| Takashi Itovama,2022    | ★ | ★ | ★ | ☆ | ★☆ | ★ | ★ | ☆ | 6 |
| Kazutake Yagi,2023      | ★ | ★ | ★ | ☆ | ★★ | ★ | ★ | ★ | 8 |
| Truong, L. F.,2023      | ★ | ★ | ★ | ☆ | ★☆ | ★ | ★ | ☆ | 6 |
| John P. Marinelli,2023  | ★ | ★ | ★ | ☆ | ★☆ | ★ | ★ | ☆ | 6 |

### Legend

**Table S1:** This table presents the NOS scale scores of 41 studies, which assess the risk of bias by assessing the quality of cohort studies in three aspects: selectivity, comparability, and outcome.

The **black stars** represent the scores obtained, while the **white stars** represent the scores not obtained. The total score is 9 points, with a score greater than 7 indicating high-quality research
